# Supplementary material for: Anhydrous proton conductor consisting of protamine–monododecyl phosphate composite with self-assembled structure
Source: Royal Society of Chemistry journal article supplement (doi:10.1039/d3ra07191j), 2023-01-01
Supplement: d3ra07191j1.pdf [file d3ra07191j1.pdf]

Anhydrous proton conductor consisting of protamine–monododecyl phosphate composite with self-assembled structure

Masanori Yamada\* and Naoaki Yoshihara

Department of Chemistry, Faculty of Science, Okayama University of Science, Ridaicho, Kita-ku, Okayama 700-0005, Japan

[\*] Corresponding author

Department of Chemistry, Faculty of Science, Okayama University of Science,  
Ridaicho, Kita-ku, Okayama 700-0005, Japan

Tel: +81 86 256 9550

Fax: +81 86 256 9550

E-mail: [myamada@chem.ous.ac.jp](mailto:myamada@chem.ous.ac.jp)

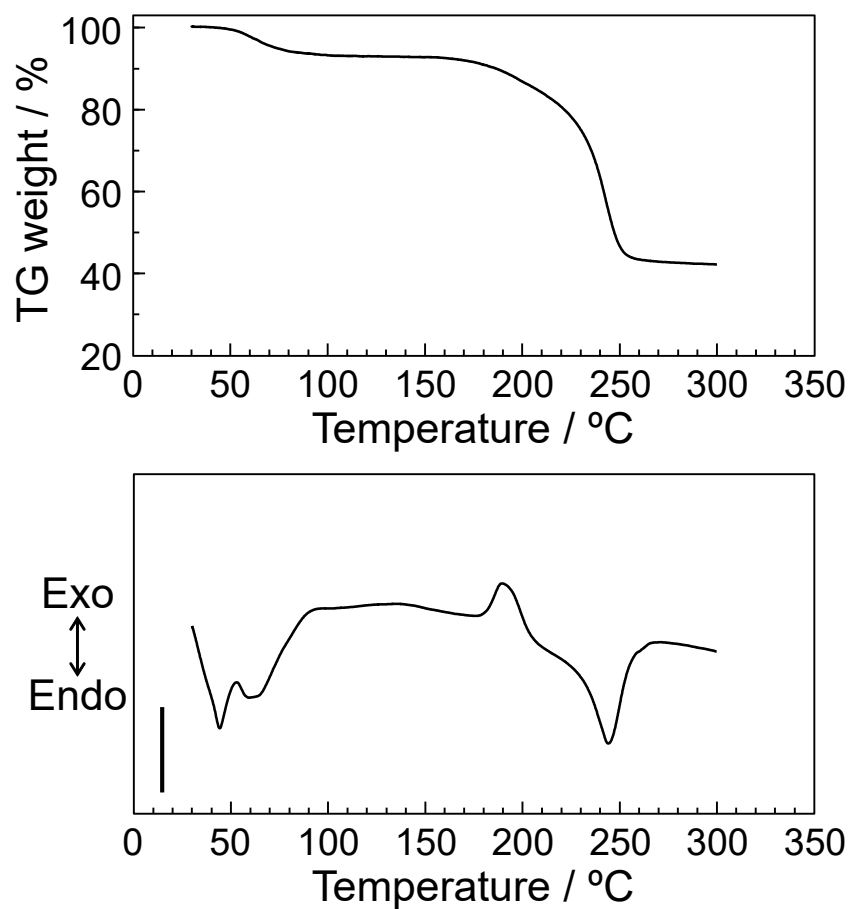

**Fig. S1** TG (a) and DTA (b) curves of  $R=0.95$  composite. The TG-DTA measurements were done at the heating rate of  $10\text{ }^{\circ}\text{C min}^{-1}$  under flowing dry-nitrogen. The scale bar in Fig. S1(b) shows  $20\text{ }\mu\text{V}$ . Similar results were obtained for triplicate experiments.

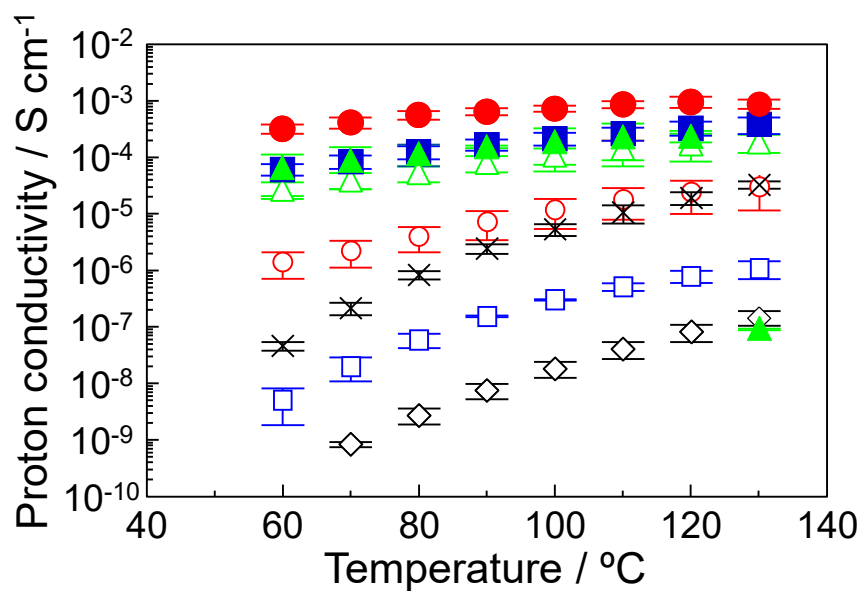

**Fig. S2** Proton conductivity of the P-MDP composites. The molar ratios are ( $*$ )  $R=0.6$ , ( $\odot$ )  $R=0.7$ , ( $\triangle$ )  $R=0.8$ , ( $\square$ )  $R=0.9$ , ( $\odot$ )  $R=0.93$ , ( $\otimes$ )  $R=0.95$ , and ( $\blacksquare$ )  $R=0.98$ . ( $\otimes$ ) shows the P-MP composite with  $R=0.95$ . The error bars indicate the standard deviation.
